# Supplementary material
Source: publisher figshare collection journal article supplement (https://sage.figshare.com/ndownloader/files/15681101)
Supplement: Supplementary file 1 [file 15681101]

## Appendix I

### Collective Memory of America

#### *Instructions*

In this survey we are interested in what people think and believe about America and America's past. There are no right or wrong answers. Please answer as honestly as you can. Please do not consult any outside sources (books, the internet, other people, etc.). We are only interested in what you yourself think, believe, and remember about America.

#### SECTION I: AMERICAN MEMORY

- 1.) What is the origin of America? Describe in one sentence. [open response]
- 2.) List the top five most important events that brought about America.

Event 1:  
Event 2:  
Event 3:  
Event 4:  
Event 5:

- 3.) Which events should all Americans remember about their history? List the top ten most important events that all Americans should remember. These events may come from any point in America's history, from the origins to the present day.

Event 1:  
Event 2:  
Event 3:  
Event 4:  
Event 5:  
Event 6:  
Event 7:  
Event 8:  
Event 9:  
Event 10:

- 4.) When did America begin? [*Enter a year*]
- 5.) Is the United States exceptional among nations? Y/N  
=>what makes it exceptional/not exceptional? Explain in 2-3 sentences [open response]

- 6.) List the first five words that come to mind when you hear the word "Patriotism"

Word 1:  
Word 2:  
Word 3:  
Word 4:  
Word 5:

7.) How important would you say being an American is to your personal identity?

- (a.) Extremely Important
- (b.) Very Important
- (c.) Moderately Important
- (e.) Not very Important
- (f.) Not at all Important

8.) Is America the “City on a Hill,” setting an example that other countries should follow?

Select all that apply:

America **is** the City on a Hill  
America **was** the City on a Hill  
America **never was** the City on a Hill

9.) *Should* America be the “City on a Hill? Y/N

*[The order of questions 10-13 was randomized for each participant. Participants were given one minute for each of the four questions, after which they were automatically advanced to the next question.]*

10.) What are you worried about for your personal future? Please list the future events in your own personal life that you are worried about.

11.) What are you worried about for your country’s collective future? Please list the events in the country’s future that you are worried about.

12.) What are you excited about for your personal future? Please list the events in your own personal future that you are excited about.

13.) What are you excited about for your country’s future? Please list the events in your country’s future that you are excited about.

## SECTION II: DEMOGRAPHICS

14.) Which state did you grow up in? [open response]

15.) Before you turned 18, had you lived outside of your home state for more than 4 years? Y/N

16.) Have you lived outside the United States? Y/N

if Y => Where? [Open response]

How long?

- (a.) less than a year
- (b.) a year
- (c.) 1 to 4 years
- (d.) more than 4 years

How old were you?

- (a.) a child
- (b.) a teenager
- (c.) a young adult

(d.) a mature adult

17.) What is your current age? [open response]

18.) What is your gender? [open response]

19.) What is your race/ethnicity? [open response].

20.) What is your religion?

(a.) Christian

-Protestant

-Evangelical

-Catholic

-Orthodox

-Mormon

-Other: \_\_\_\_\_

(b.) Jewish

-Reform

-Conservative

-Orthodox

-Ultra-Orthodox

-Other: \_\_\_\_\_

(c.) Muslim

-Sunni

-Shia

-Kharijite

-Other: \_\_\_\_\_

(d.) Buddhist

(e.) Hindu

(f.) Atheist/agnostic

(g.) No religious identity

(h.) Other: \_\_\_\_\_

21.) How frequently did you attend religious services in the past year?

(a.) More than weekly

(b.) Weekly

(c.) Monthly

(d.) A couple times a year

(e.) Once per year

(f.) Never

22.) What is your highest level of education?

(a.) Less than a high school degree

(b.) High school degree or equivalent

(c.) Some college, no degree

(d.) Associate's degree

(e.) Bachelor's degree

(f.) Master's Degree

(g.) Professional Degree

(h.) Doctorate

- 23.) Are you employed?  
(a.) Not employed  
(b.) Self-employed  
(c.) Employed: hourly  
(d.) Employed: salary
- 24.) What is your occupation? [Open response]
- 25.) Are you a citizen of the US? Y/N  
If Y => have you always been a citizen of the US? Y/N  
If N => at what age did you become a citizen of the US?
- 26.) What is your *household* income?  
(a.) Less than \$20,000  
(b.) \$20,000-\$34,999  
(c.) \$35,000 to \$49,999  
(d.) \$50,000 to \$74,999  
(e.) \$75,000 to \$99,999  
(f.) over \$100,000
- 27.) To what socioeconomic class would you say you belong to?  
(a.) Upper  
(b.) Upper Middle  
(c.) Middle  
(d.) Working  
(e.) Lower
- 28.) Do you own a home?  
Y/N
- 29.) Do you own a gun?  
Y/N
- 30.) To what degree do you agree with the statement: "Immigrants are an important part of America."  
(a.) Strongly Agree  
(b.) Somewhat Agree  
(c.) No Opinion  
(d.) Somewhat Disagree  
(e.) Strongly Disagree
- 31.) What ideology or ideologies would you say you identify with? Select all that apply.  
Liberal  
Conservative  
    -Social  
    -Fiscal  
Progressive  
Libertarian  
Socialist  
Other: \_\_\_\_\_

32.) What is your political party identification?

- (a.) Democrat
- (b.) Republican
- (c.) Independent
- (d.) Other: \_\_\_\_\_
- (e.) No party affiliation

33.) In what kind of area were you primarily raised?

- (a.) Rural
- (b.) Small Town
- (c.) Suburban
- (d.) Urban
- (e.) Other: \_\_\_\_\_

34.) Who did you vote for in the last presidential election?

- (a.) Donald Trump
- (b.) Hillary Clinton
- (c.) Gary Johnson
- (d.) Jill Stein
- (e.) Evan McMullin
- (f.) Darrell Castle
- (g.) Did not Vote
- (h.) Prefer not to say

35.) During this survey, did you consult any outside sources (other people, the internet, books, etc.)?

Y/N

Thank you for completing our survey!

## Appendix II

### Event Category Count

*Number of participants from full sample mentioning each event category.*

| Event                            | Count |
|----------------------------------|-------|
| Revolutionary War                | 1231  |
| Declaration of Independence      | 712   |
| Christopher Columbus Discovery   | 679   |
| Civil War                        | 576   |
| British Colonization             | 427   |
| Constitution                     | 407   |
| Pilgrims                         | 345   |
| Boston Tea Party                 | 327   |
| Slavery                          | 238   |
| WWII                             | 225   |
| Native American Genocide         | 222   |
| British Taxes                    | 203   |
| Displacement of Native Americans | 186   |
| End of Slavery                   | 138   |
| Immigration                      | 132   |
| George Washington                | 115   |
| Louisiana Purchase               | 113   |
| Discovery                        | 108   |
| 9/11                             | 108   |
| Resentment of British Rule       | 103   |
| 13 Colonies                      | 103   |
| Westward Expansion               | 101   |
| European Exploration             | 95    |
| Civil Rights                     | 91    |
| Bill of Rights                   | 88    |
| Industrialization                | 86    |
| Formation of Government          | 86    |
| Non                              | 83    |
| Independence                     | 81    |
| Religious Freedom                | 76    |
| Jamestown                        | 75    |
| Native Americans                 | 75    |
| Boston Massacre                  | 72    |
| Desire for Freedom               | 72    |
| Religious Persecution            | 71    |
| Colonization                     | 64    |
| European Colonization            | 62    |
| Native American Migration        | 60    |
| War                              | 59    |
| Democracy                        | 54    |

|                                        |    |
|----------------------------------------|----|
| French and Indian War                  | 54 |
| Indian Wars                            | 50 |
| 1st & 2nd Continental Congress         | 47 |
| Vietnam War                            | 46 |
| JFK Assassination                      | 45 |
| Friendly Relations with Natives        | 45 |
| Capitalism                             | 44 |
| European Discovery                     | 42 |
| Lincoln Assassination                  | 42 |
| Establishing the States                | 42 |
| First President                        | 39 |
| Technology                             | 38 |
| Desire for Property/Wealth             | 38 |
| Oppression in Europe                   | 36 |
| Great Depression                       | 36 |
| Suffrage                               | 36 |
| North American Landmass                | 32 |
| Stamp Act                              | 32 |
| Barack Obama                           | 31 |
| War of 1812                            | 29 |
| Gold Rush                              | 29 |
| Desire for Better Life                 | 28 |
| Manifest Destiny                       | 26 |
| European Immigration                   | 25 |
| British Empire                         | 25 |
| French Aid in Revolution               | 25 |
| Space Race                             | 23 |
| Amerigo Vespucci                       | 21 |
| Moon Landing                           | 21 |
| Cold War                               | 21 |
| World Wars                             | 21 |
| Nuclear Weapons                        | 21 |
| Exploration                            | 20 |
| Exploration                            | 20 |
| Trail of Tears                         | 19 |
| Constitution and Bill of Rights        | 19 |
| Establishing Government                | 18 |
| European Contact with Native Americans | 17 |
| Paul Revere                            | 17 |
| Lewis and Clark                        | 17 |
| Equal Rights                           | 16 |
| European Technology                    | 16 |
| Terrorism                              | 16 |
| Founding Fathers                       | 16 |
| Diversity                              | 16 |

|                                |    |
|--------------------------------|----|
| Great Migration                | 15 |
| Donald Trump                   | 15 |
| Martin Luther King             | 15 |
| Marriage Equality              | 15 |
| Trade                          | 14 |
| Puritans                       | 14 |
| Protestant Reformation         | 14 |
| Railroads                      | 14 |
| Freedom                        | 14 |
| Greed                          | 14 |
| Leif Eriksson - Vikings        | 13 |
| Conquistadors                  | 13 |
| Imperialism                    | 13 |
| Abraham Lincoln                | 13 |
| Desegregation                  | 13 |
| New England Colonies           | 12 |
| Articles of Confederation      | 12 |
| WWI                            | 11 |
| Pearl Harbor                   | 11 |
| Britain's War with France      | 11 |
| European Superior Civilization | 11 |
| 4th of July                    | 10 |

---



### Appendix III

#### Additional analyses: Age and Education

One potential confound in this analysis is age. Older adults attend to and remember positive information more readily than younger adults – that is, they often show a positivity bias in cognitive processing (Mather & Carstensen, 2005). Age and Foundations Ratings were indeed statistically, but weakly, positively correlated,  $r(1704) = .12, p < .001$ . However, in our sample political groups did not differ by age, once accounting for religiosity. In a factorial ANOVA on age with political affiliation and religiosity as predictors, only a main effect of religiosity emerged,  $F(3,1688) = 5.06, p = .002, \eta^2_p = .01$ . Protestants ( $M = 37.99 [36.71, 39.26]$ ) were on average older than Atheist/Agnostics ( $M = 35.17 [33.75, 36.58]$ ),  $M_{diff} = 2.82 [.91, 4.73], p < .004$ , and than those with no religious identity ( $M = 34.47 [33, 35.94]$ ),  $M_{diff} = 3.52 [1.57, 5.47], p < .001$ . Catholics ( $M = 36.71 [34.78, 38.63]$ ) were marginally older than those with no religious identity,  $M_{diff} = 2.24 [-.18, 4.66], p = .07$ . Atheist/Agnostics and the religiously unaffiliated did not differ,  $p = .5$ , nor did Catholics and Protestants,  $p = .28$ . However, participants of different political affiliations did not differ in age, when accounting for religion,  $p = .24$ , and there was no interaction,  $p = .65$ . Republicans' stronger positivity bias in the American origin story thus seems unlikely to reduce merely to age effects.

In order to more rigorously rule out age as a primary driver of the differences in positivity bias between political groups, we compared age-matched sub-samples. Although our Christian and Republican samples had more older and middle aged participants, the bulk of participants in all conditions were in their 20's and 30's; this is typical of MTurk samples (Ross, Zaldivar, Irani, & Tomlinson, 2010). We therefore subsampled participants 40 years old or younger. In this younger group,  $N = 1201$ , there were no age differences between different religious or political

groups, all  $p > .05$ . Repeating the religiosity by political affiliation factorial ANOVA on Foundations Ratings using only younger participants, we again found only a main effect of political affiliation,  $F(3,1185) = 3.84, p = .009, \eta^2_p = .01$ . Young Republicans ( $M = .73 [.69, .77]$ ) produced more positive origin stories than young Democrats ( $M = .65 [.63, .67]$ ),  $M_{diff} = .08 [.04, .13], p = .001$ , than Independents ( $M = .66 [.64, .69]$ ),  $M_{diff} = .07 [.01, .12], p = .01$ , and than the politically unaffiliated ( $M = .65 [.59, .71]$ ),  $M_{diff} = .08 [.01, .16], p = .03$ . There was no main effect on Foundations Ratings for religion,  $p = .8$ , nor an interaction,  $p = .89$ . The above reported evidence suggests that our Republican sample did not produce more positive origin stories simply because they were older.

*Education.* Given the role of formal education in crafting collective memory, we examined whether educational attainment interacted with or explained some of the variance. When comparing participants with less than a bachelor's degree (no high school diploma, high school diploma, associates), a bachelor's degree or some college, and those with higher degrees (Masters, PhD, professional degrees, e.g. MD or JD), educational attainment did predict differences in Foundations ratings,  $F(2,1996) = 3.93, p = .02, \eta^2 = .004$ . Participants with advanced degrees ( $M = .64 [.61, .67]$ ) were more likely to suggest negative events than were those with college education only ( $M = .68 [.67, .69]$ ),  $M_{diff} = .04 [.003, .07], p = .03$ , and than those with no college education ( $M = .70 [.68, .72]$ ),  $M_{diff} = .06 [.02, .10], p = .005$ . Those with college and no college did not differ from one another,  $M_{diff} = .02 [-.01, .05], p = .19$ .

Educational attainment likewise varied by political affiliation,  $\chi^2(6) = 22.42, p = .001$ . For a comparison of actual to expected counts, see Table 5. Democrats were overrepresented among holders of advanced degrees, whereas Republicans and the non-affiliated were overrepresented

among those with no college degree by about the same amount. Recall, however, that despite showing similar levels of educational attainment to Republicans, the non-affiliated showed a pattern of foundations ratings comparable to Democrats and Independents, suggesting that positivity biases in the national origin story were not primarily driven by educational attainment. This proposition was supported by a factorial ANOVA in which educational attainment was entered with political affiliation. There was no main effect of education,  $F(2, 1956) = 1.56, p = .21, \eta^2 = .002$ , and no interaction,  $F(6, 1956) = 0.84, p = .54, \eta^2 = .003$ . Only the above reported main effect of political affiliation retained significance. Again, political affiliation best predicted variance in Foundations Ratings relative to other demographic factors.

Table 5.

*Crosstabs for Political Affiliation by Educational Attainment. \* The numbers in parentheses indicate the count expected if the cells were proportionally representative, and numbers outside parentheses indicate the actual count..*

| Education         | Political Affiliation |            |             |                | TOTAL |
|-------------------|-----------------------|------------|-------------|----------------|-------|
|                   | Democrat              | Republican | Independent | No Affiliation |       |
| Less than college | 157(192)              | 119(100)   | 144(134)    | 44(38)         | 464   |
| College           | 537(521)              | 258(272)   | 358(364)    | 105(102)       | 1258  |
| Advanced degree   | 121(102)              | 48(53)     | 67(71)      | 10(20)         | 246   |
| TOTAL             | 815                   | 425        | 569         | 159            |       |

\* $\chi^2(6) = 22.42, p = .001$
